# Supplementary material for: Pharmacist Interventions in Minimizing Drug Related Problems in Diabetes With Co-Existing Hypertension: A Five-Year Overview and Ground Report From India
Source: PubMed Central journal article supplement (PMC10106567; doi:10.3389/ijph.2023.1605808), 2023-04-03

Supplementary files

Supplementary file 1: Between-subject's factors: Number of generic drugs prescribed (Drug utilization study of diabetes and hypertension at tertiary care hospitals, India, five years study.)

| Variable                           | SPSS Code | N   |
|------------------------------------|-----------|-----|
| Number of generic drugs prescribed | 0         | 156 |
|                                    | 1         | 212 |
|                                    | 2         | 246 |
|                                    | 3         | 371 |
|                                    | 4         | 438 |
|                                    | 5         | 491 |

Supplementary file 2: Tests of between-subject's effects: DV- Number of generic drugs prescribed (Drug utilization study of diabetes and hypertension at tertiary care hospitals, India, five years study.)

| Source          | Dependent Variable            | Type III Sum of Squares  | df   | Mean Square    | F       | Sig. |
|-----------------|-------------------------------|--------------------------|------|----------------|---------|------|
| Corrected Model | Overall cost of the treatment | 856825932.4 <sup>a</sup> | 5    | 171365186.4    | 5.2     | .001 |
|                 | Length of stay in days        | 28.7 <sup>b</sup>        | 5    | 5.7            | 1.0     | .30  |
| Intercept       | Overall cost of the treatment | 841690771174.0           | 1    | 841690771174.0 | 25581.8 | .001 |
|                 | Length of stay in days        | 66923.9                  | 1    | 66923.9        | 12566.8 | .001 |
| Generic No.     | Overall cost of the treatment | 856825932.4              | 5    | 171365186.4    | 5.2     | .001 |
|                 | Length of stay in days        | 28.7                     | 5    | 5.7            | 1.0     | .030 |
| Error           | Overall cost of the treatment | 62776750847.1            | 1908 | 32901861.0     |         |      |
|                 | Length of stay in days        | 10160.9                  | 1908 | 5.3            |         |      |
| Total           | Overall cost of the treatment | 1048910254130.0          | 1914 |                |         |      |
|                 | Length of stay in days        | 89375.0                  | 1914 |                |         |      |
| Corrected Total | Overall cost of the treatment | 63633576779.6            | 1913 |                |         |      |
|                 | Length of stay in days        | 10189.6                  | 1913 |                |         |      |

a. *R Squared* = .013 (*Adjusted R Squared* = .011)  
b. *R Squared* = .003 (*Adjusted R Squared* = .001)

Supplementary file 3: Summary of the drug related problems seen in our study (Drug utilization study of diabetes and hypertension at tertiary care hospitals, India, five years study.)

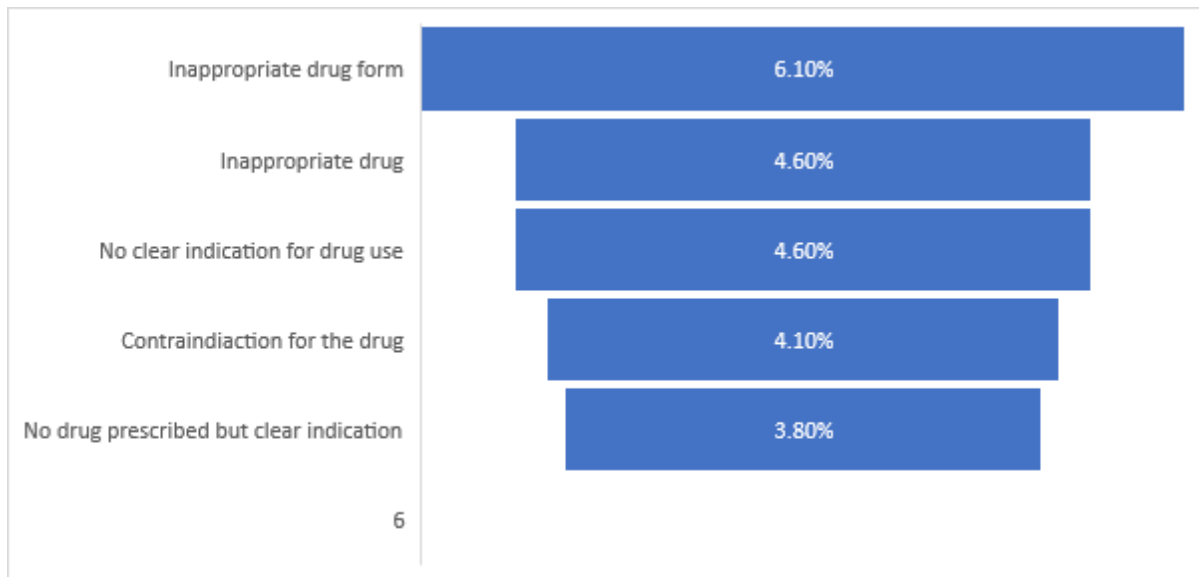

Supplement: DataSheet1.pdf [file DataSheet1.pdf]
